# Supplementary material for: Decorin inhibits proliferation and metastasis in human bladder cancer cells by upregulating P21
Source: PubMed Central journal article supplement (PMC9239591; doi:10.1097/md.0000000000029760), 2022-06-30

**Figure S1**

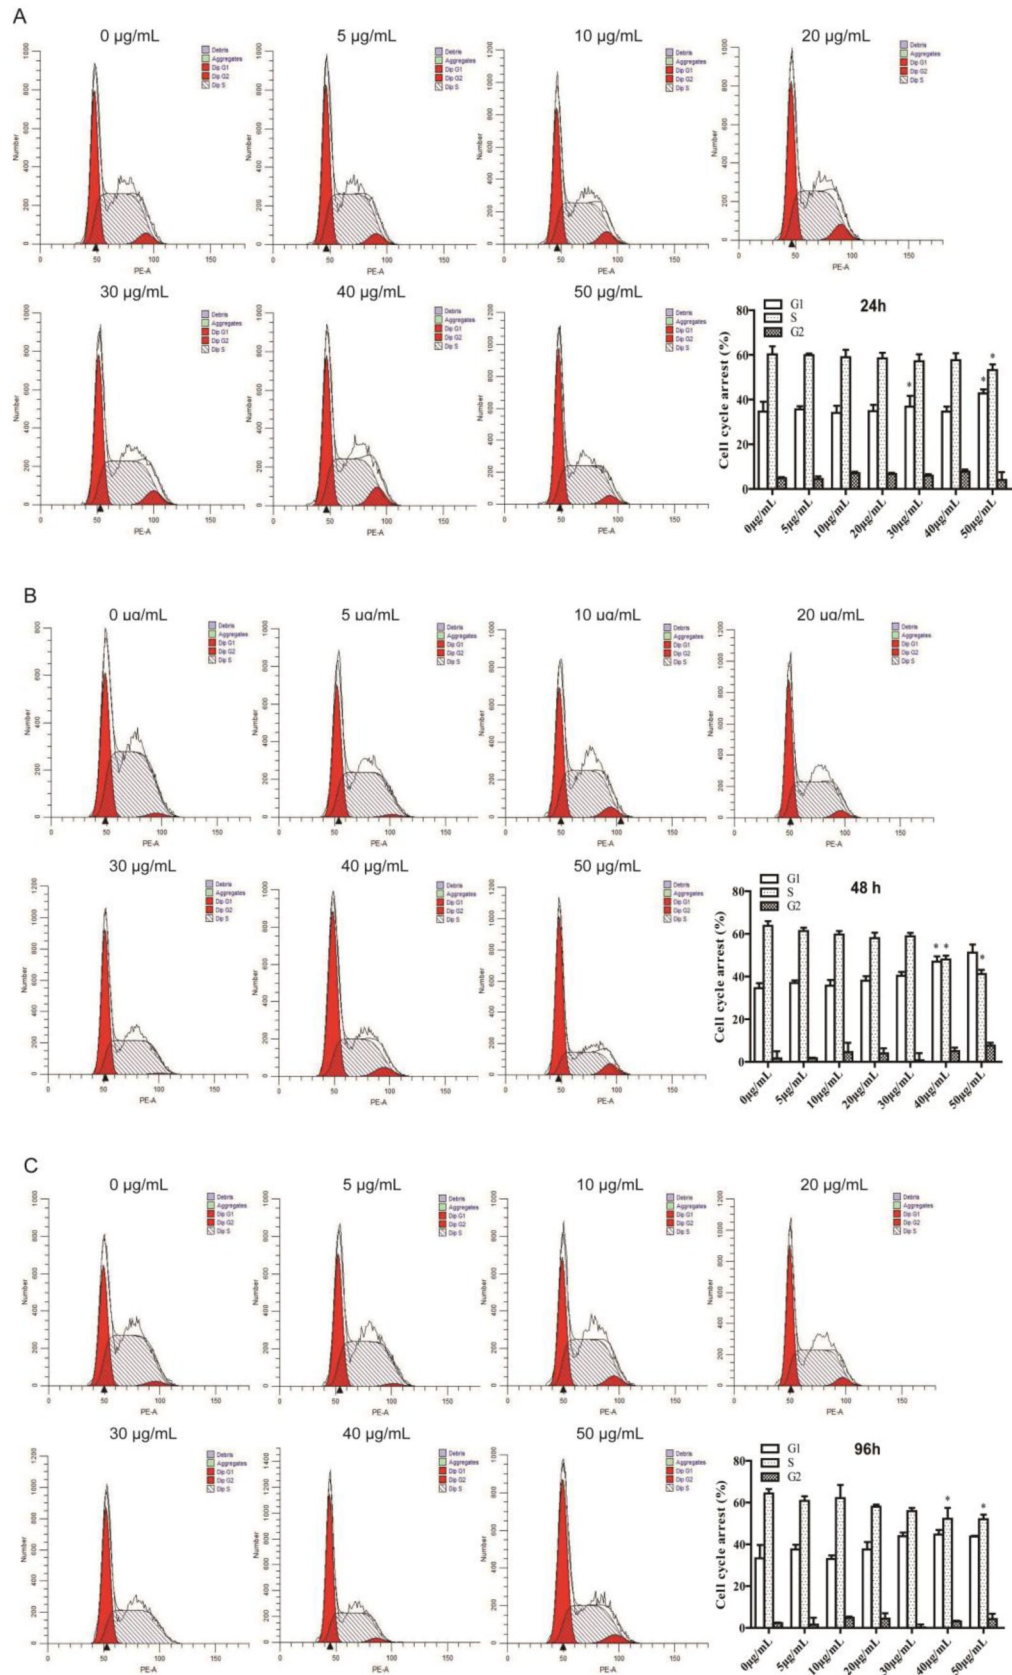

**Figure S1**

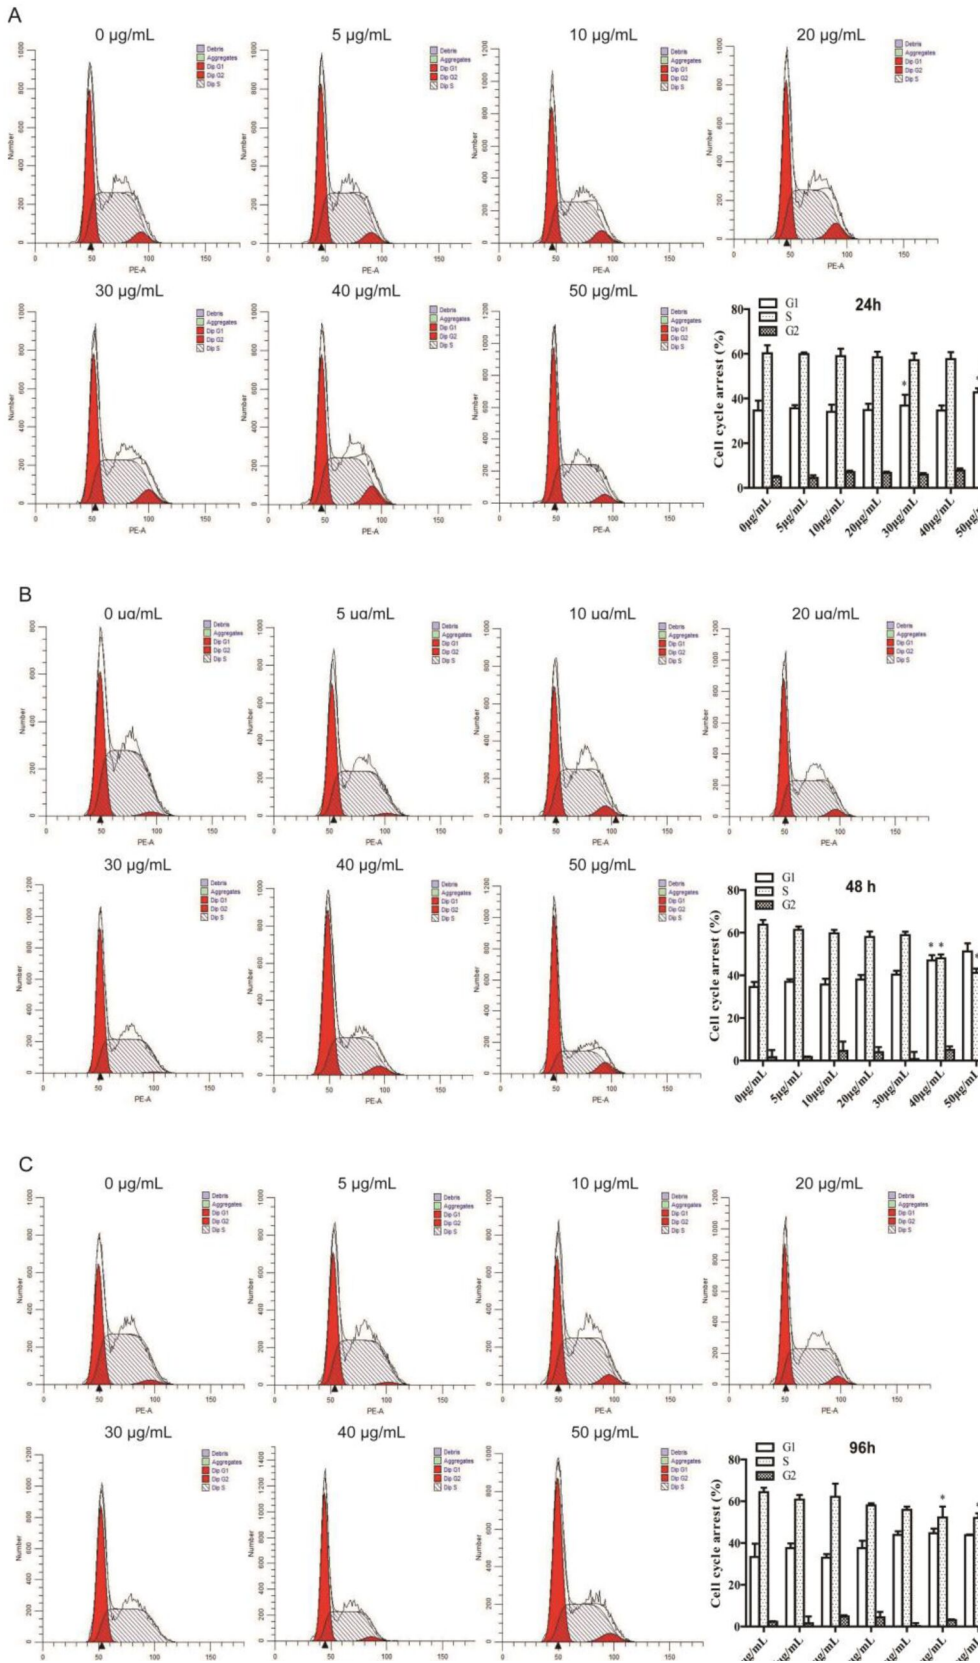

**Figure S2**

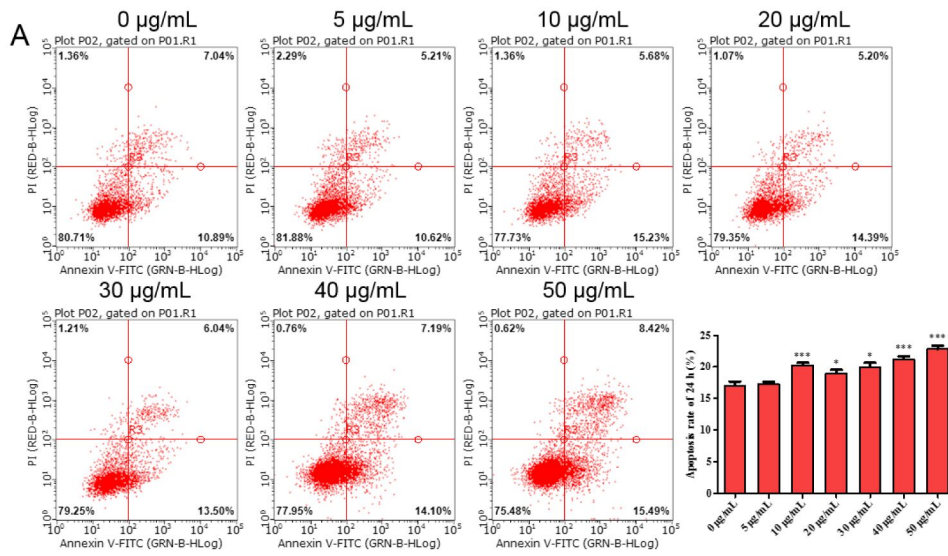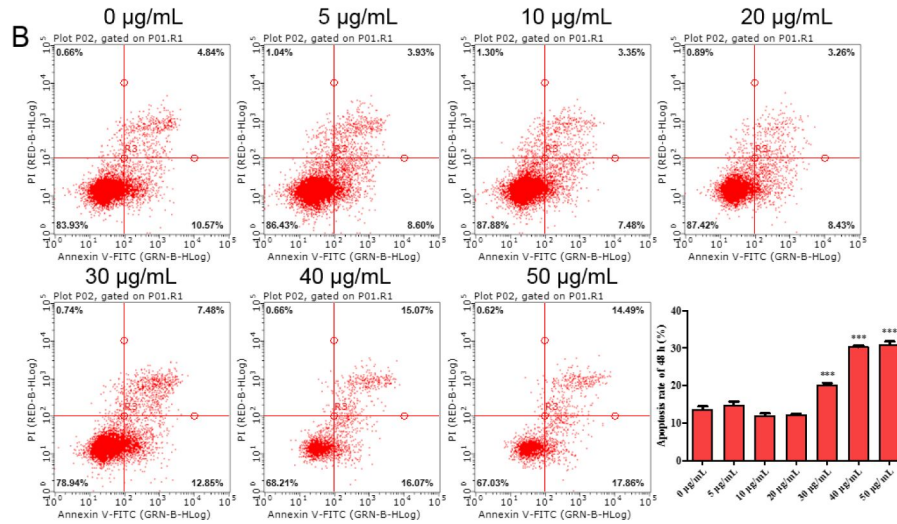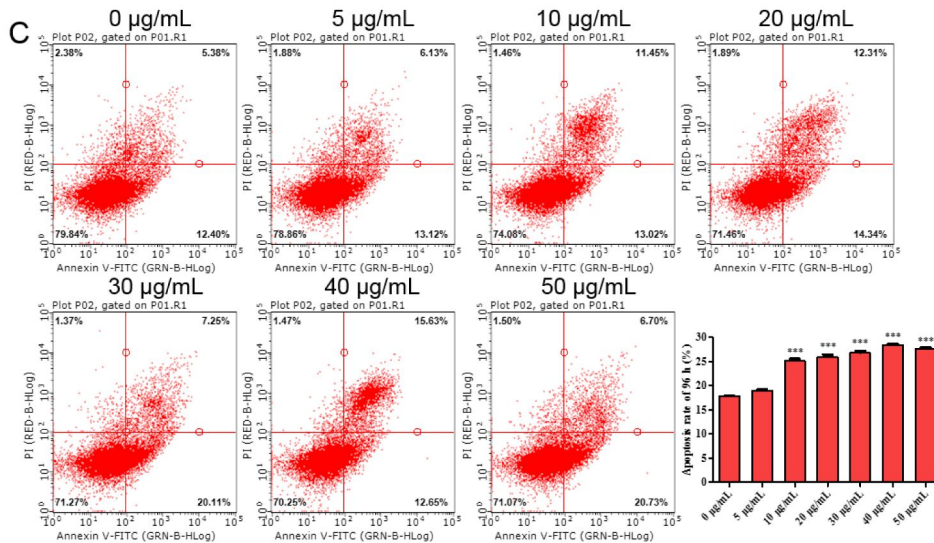

**Figure S2**

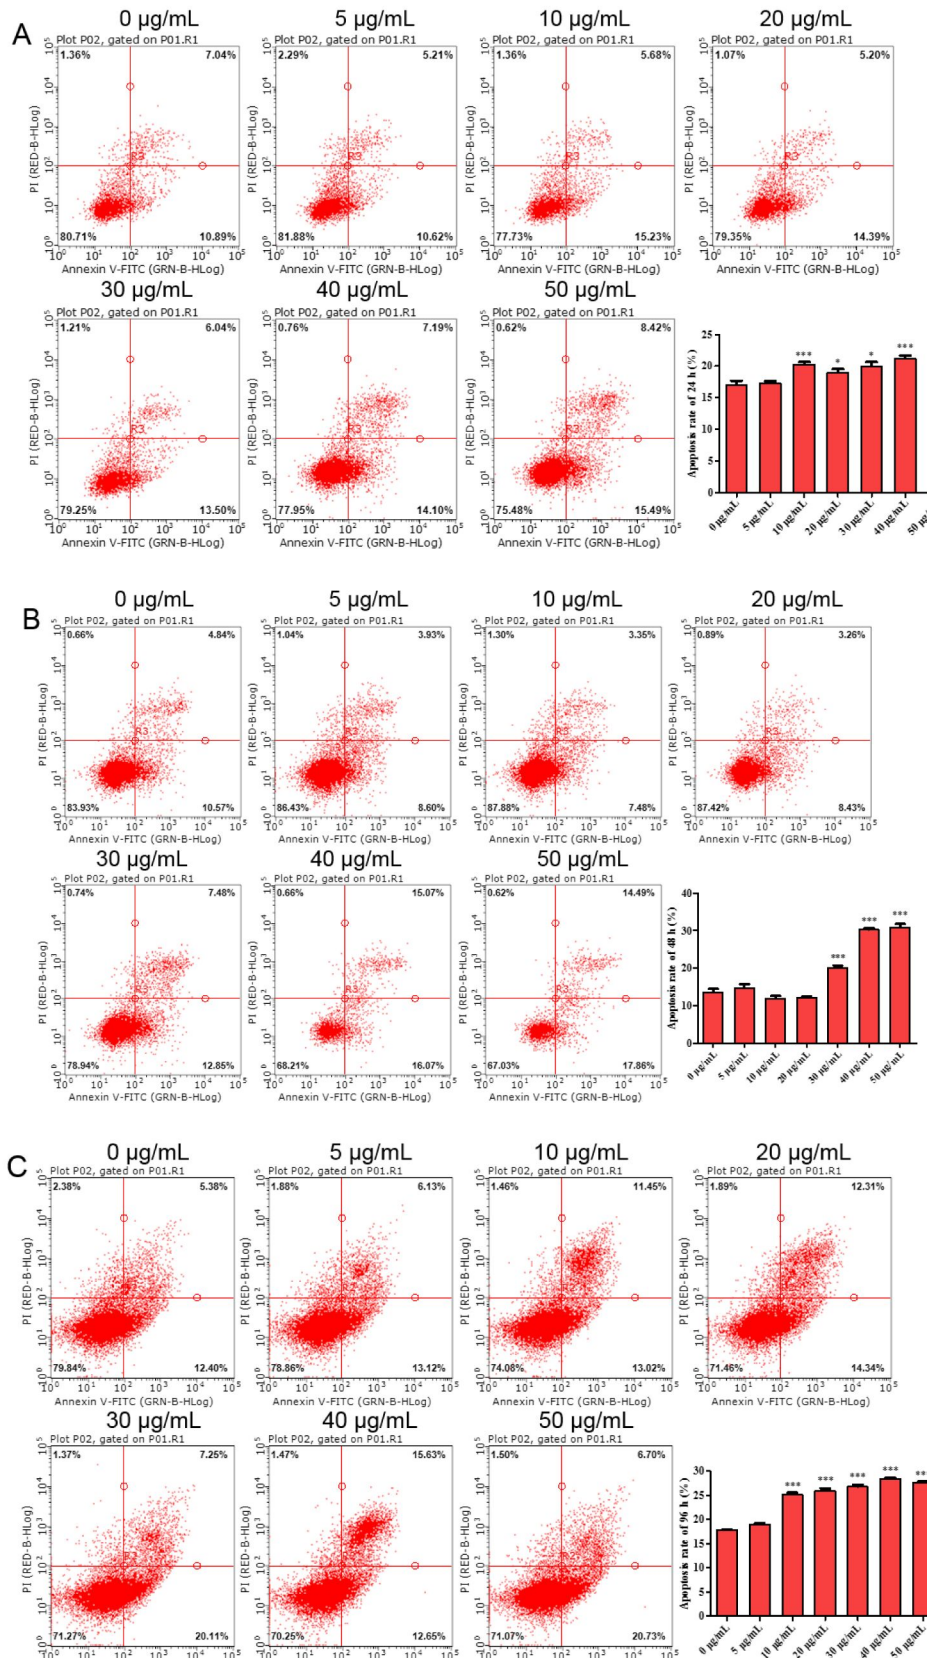

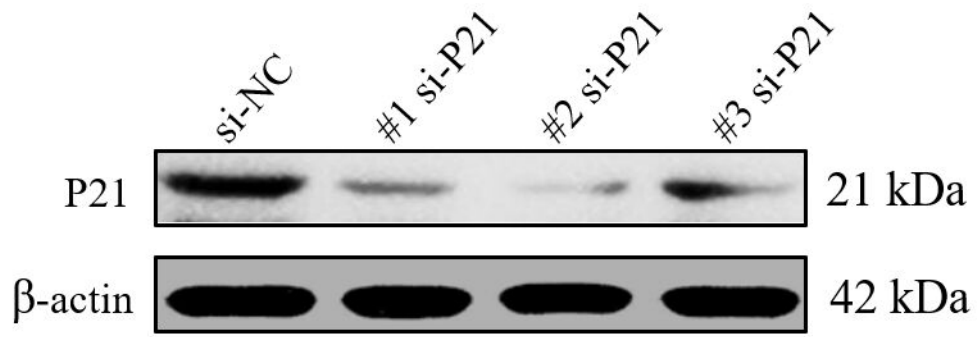

Supplement: medi-101-e29760-s001.pdf [file medi-101-e29760-s001.pdf]
